# Supplementary material
Source: MDPI journal article supplement (https://www.mdpi.com/2073-4433/13/9/1435)
Supplement: s1 [file s1]

# Supplementary Materials:

Farhan Ramadhan Nursanto <sup>1</sup>, Joana Vaz-Ramos <sup>1,2</sup>, Olivier Delhomme <sup>1</sup>, Sylvie Bégin-Colin <sup>2</sup> and Stéphane Le Calvé <sup>1,\*</sup>

<sup>1</sup> Institut de Chimie et Procédés pour l'Energie, l'Environnement et la Santé (ICPEES), UMR-7515 CNRS-Université de Strasbourg, 25 rue Becquerel, 67087 Strasbourg, France

<sup>2</sup> Institut de Physique et Chimie des Matériaux de Strasbourg (IPCMS), UMR-7504 CNRS-Université de Strasbourg, 23 rue du Lœss, 67034 Strasbourg, France

\* Correspondence: slecalve@unistra.fr; Tel.: +33-3-6885-0368

| Mon                                                       | Tue                          | Wed | Thu                                                              | Fri                                                          | Sat                                                   | Sun                                    |
|-----------------------------------------------------------|------------------------------|-----|------------------------------------------------------------------|--------------------------------------------------------------|-------------------------------------------------------|----------------------------------------|
| 15 Feb                                                    | 16<br>CAMPAIGN STARTS<br>WD1 | 17  | 18                                                               | 19<br>WE1                                                    | 20                                                    | 21                                     |
| 22 WD2<br>Sahara sand wind episode <sup>1</sup>           | 23                           | 24  | 25<br>Pollution episode <sup>2</sup>                             | 26 WE2<br>Pollution episode <sup>2</sup><br>Rain (afternoon) | 27<br>Sunny                                           | 28                                     |
| 1 Mar WD3<br>Sahara sand wind episode (weak) <sup>1</sup> | 2                            | 3   | 4<br>Pollution episode <sup>2</sup><br>Rain (afternoon)          | 5<br>WE3                                                     | 6                                                     | 7                                      |
| 8<br>WD4                                                  | 9<br>Rain (evening)          | 10  | 11<br>Rain (afternoon-night)<br>Strong wind episode <sup>3</sup> | 12<br>WE4 (8)<br>Strong wind episode <sup>3</sup>            | 13<br>Rain (noon)<br>Strong wind episode <sup>3</sup> | 14<br>Strong wind episode <sup>3</sup> |
| 15<br>CAMPAIGN FINISHES                                   |                              |     |                                                                  |                                                              |                                                       |                                        |

WD WE

Note: all working days (WD) and weekend (WE) definition are matched with the sampling period.

<sup>1</sup><https://actualite.lachainemeteo.com/actualite-meteo/2021-03-01/nouvelle-remontee-de-sable-du-sahara-sur-la-france-58539> [15] ; <sup>2</sup><http://www.atmo-grandest.eu/e> <http://www.atmo-grandest.eu/episodes-de-pollution/episodes-de-pollution> [16] ; <sup>3</sup><https://www.francebleu.fr/infos/meteo/l-alsace-toujours-en-vigilance-jaune-vent-violence-1615556378> [17]

Figure S1. Sampling campaign calendar.

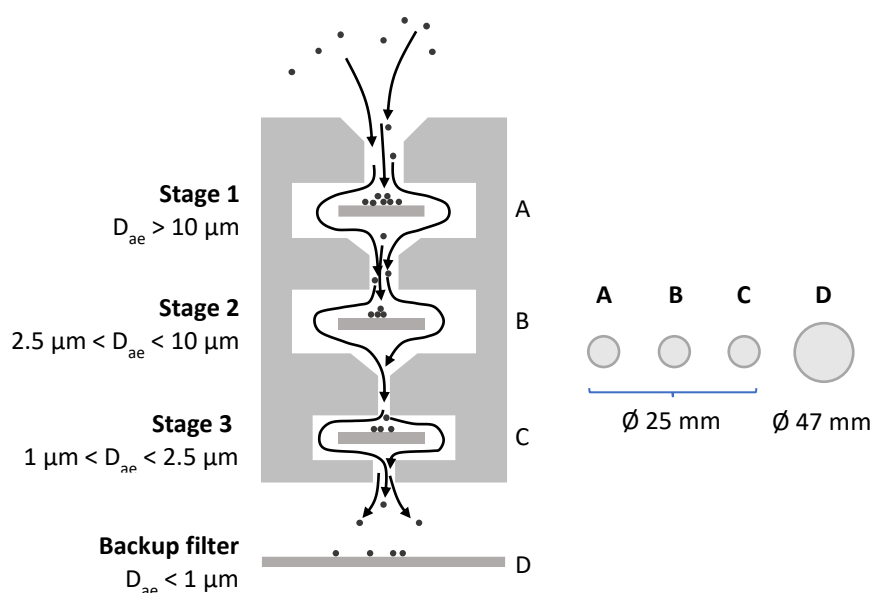

Figure S2. Scheme of three-stage cascade impactor DEKATI PM-10 and filters used.

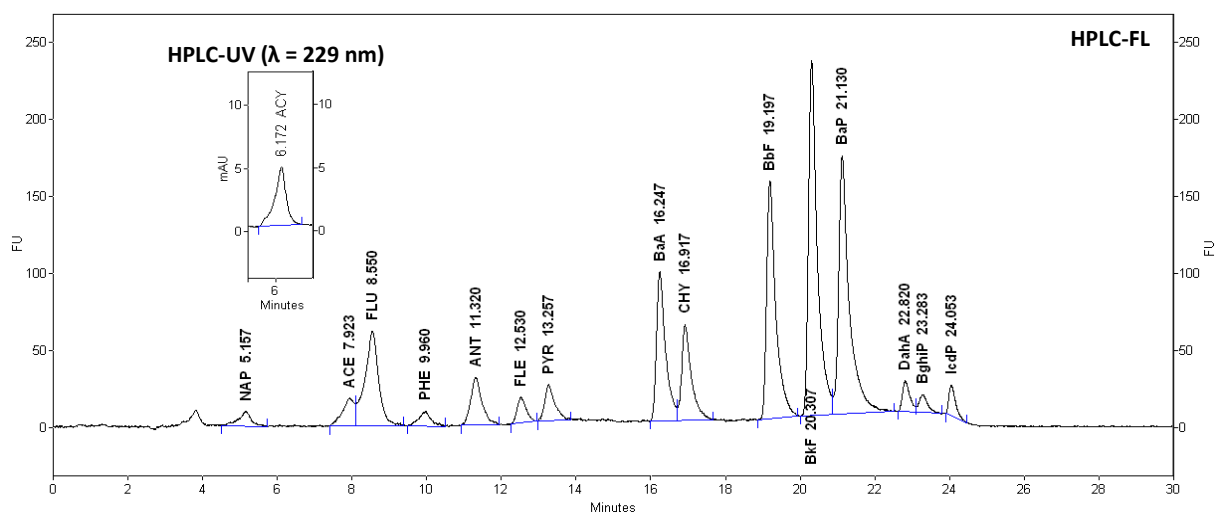

**Figure S3.** Chromatogram of 16 US EPA PAHs with concentration of 50  $\mu\text{g/L}$  in ACN 100%.

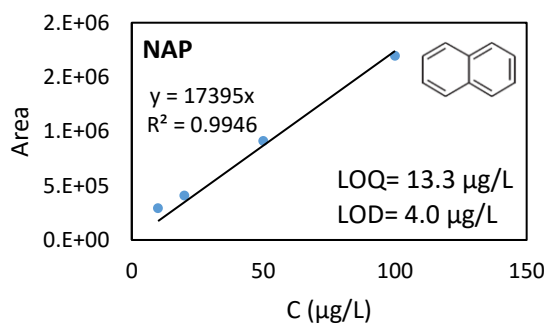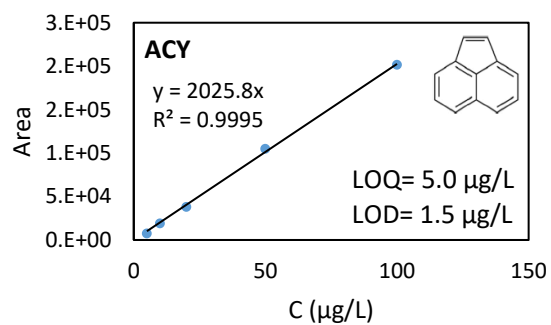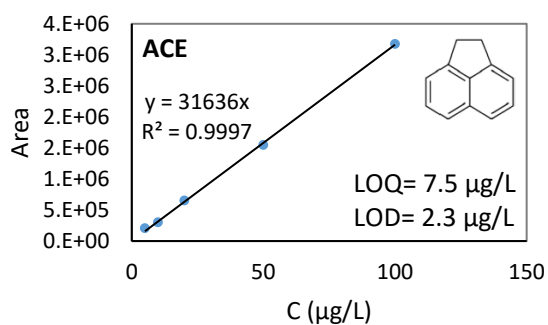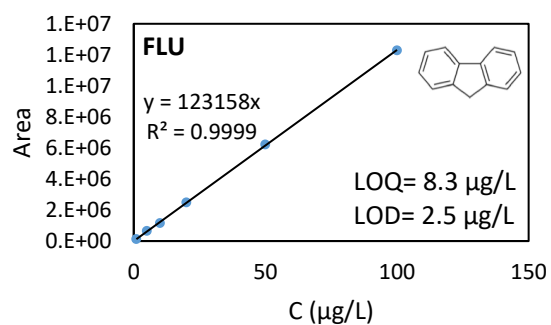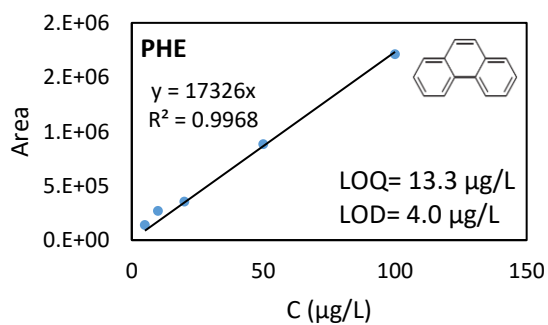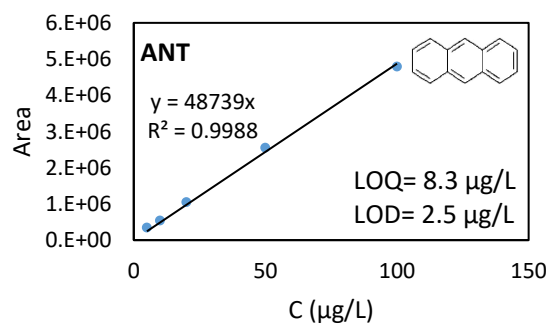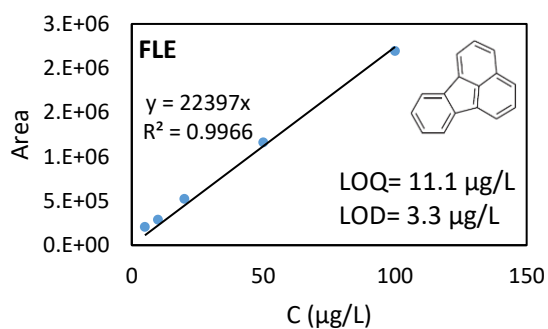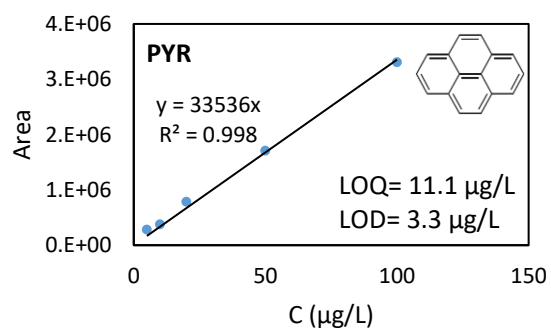

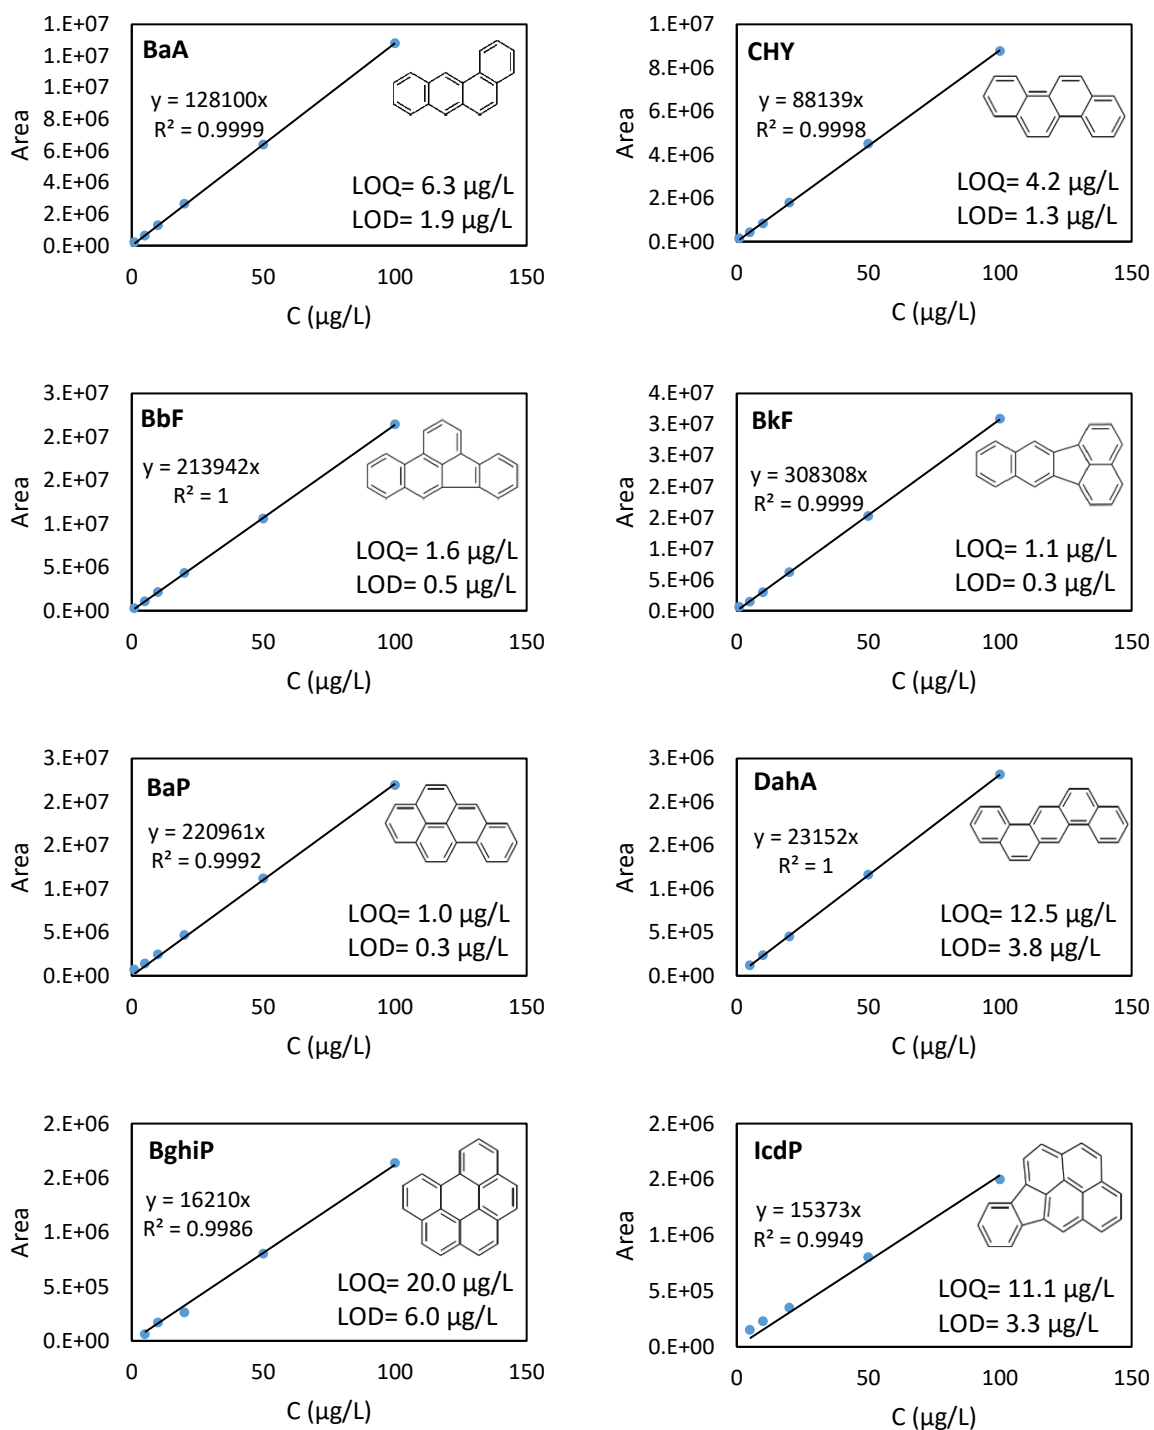

**Figure S4.** Calibration curves for PAH analysis in the range 10–100 µg L<sup>-1</sup> for NAP; 5–100 µg L<sup>-1</sup> for ACY, ACE, PHE, ANT, FLE, PYR, DahA, BghiP and IcdP; 1–100 µg L<sup>-1</sup> for FLU, BaA, CHY, BbF, BkF and BaP.

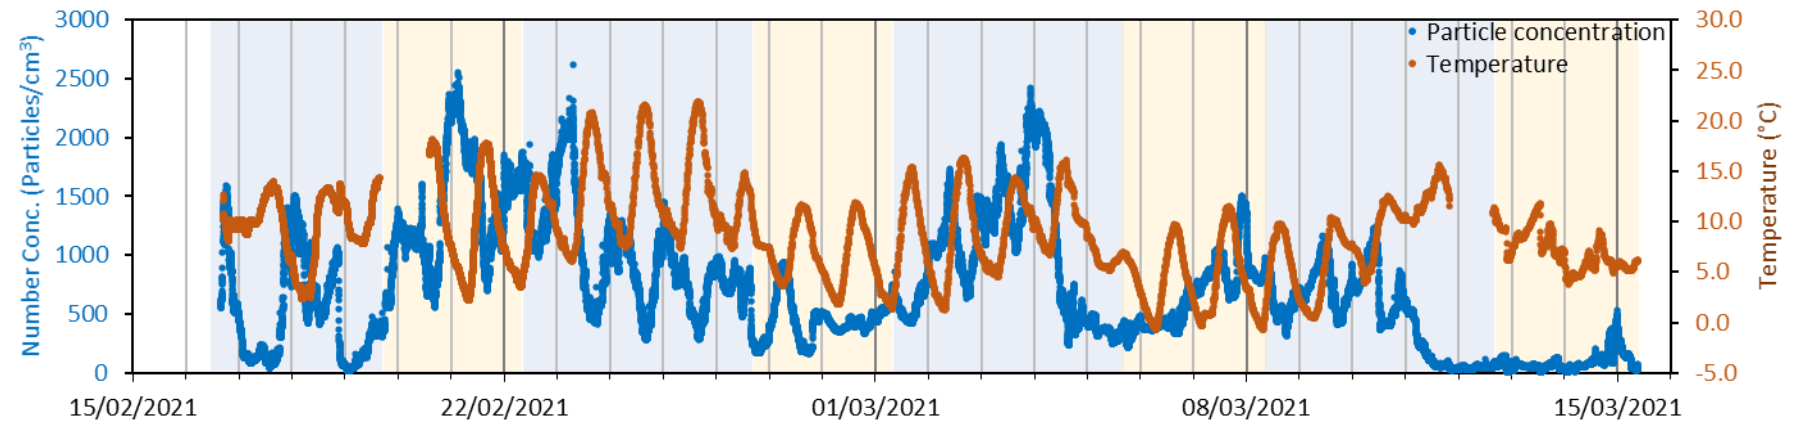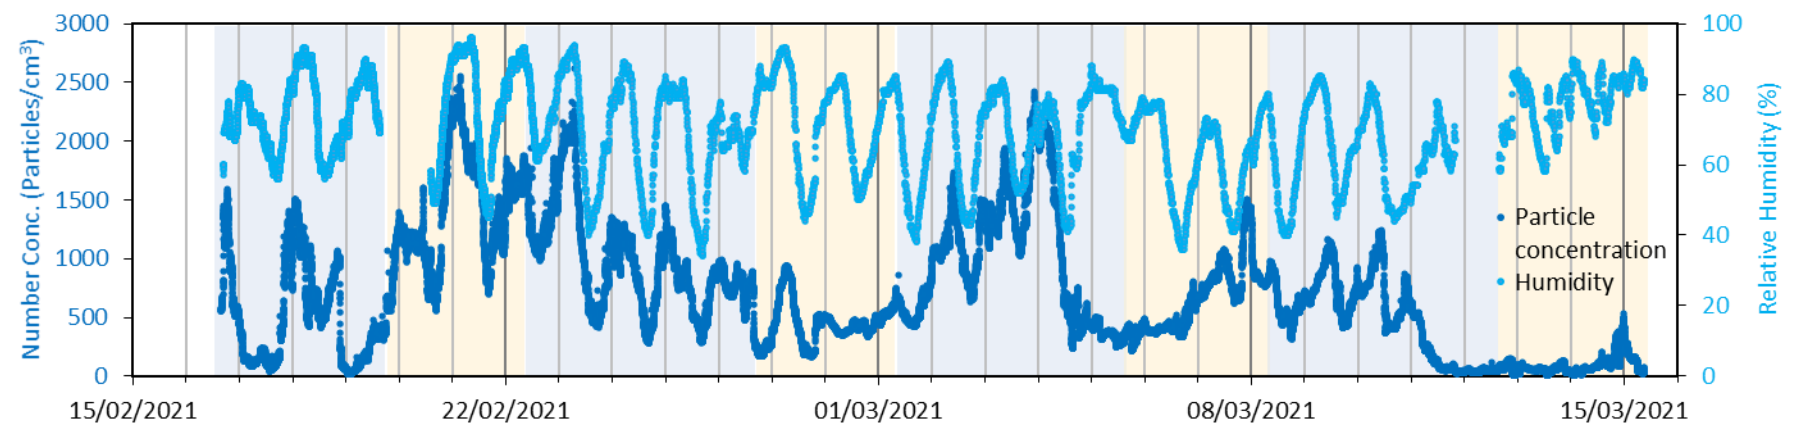

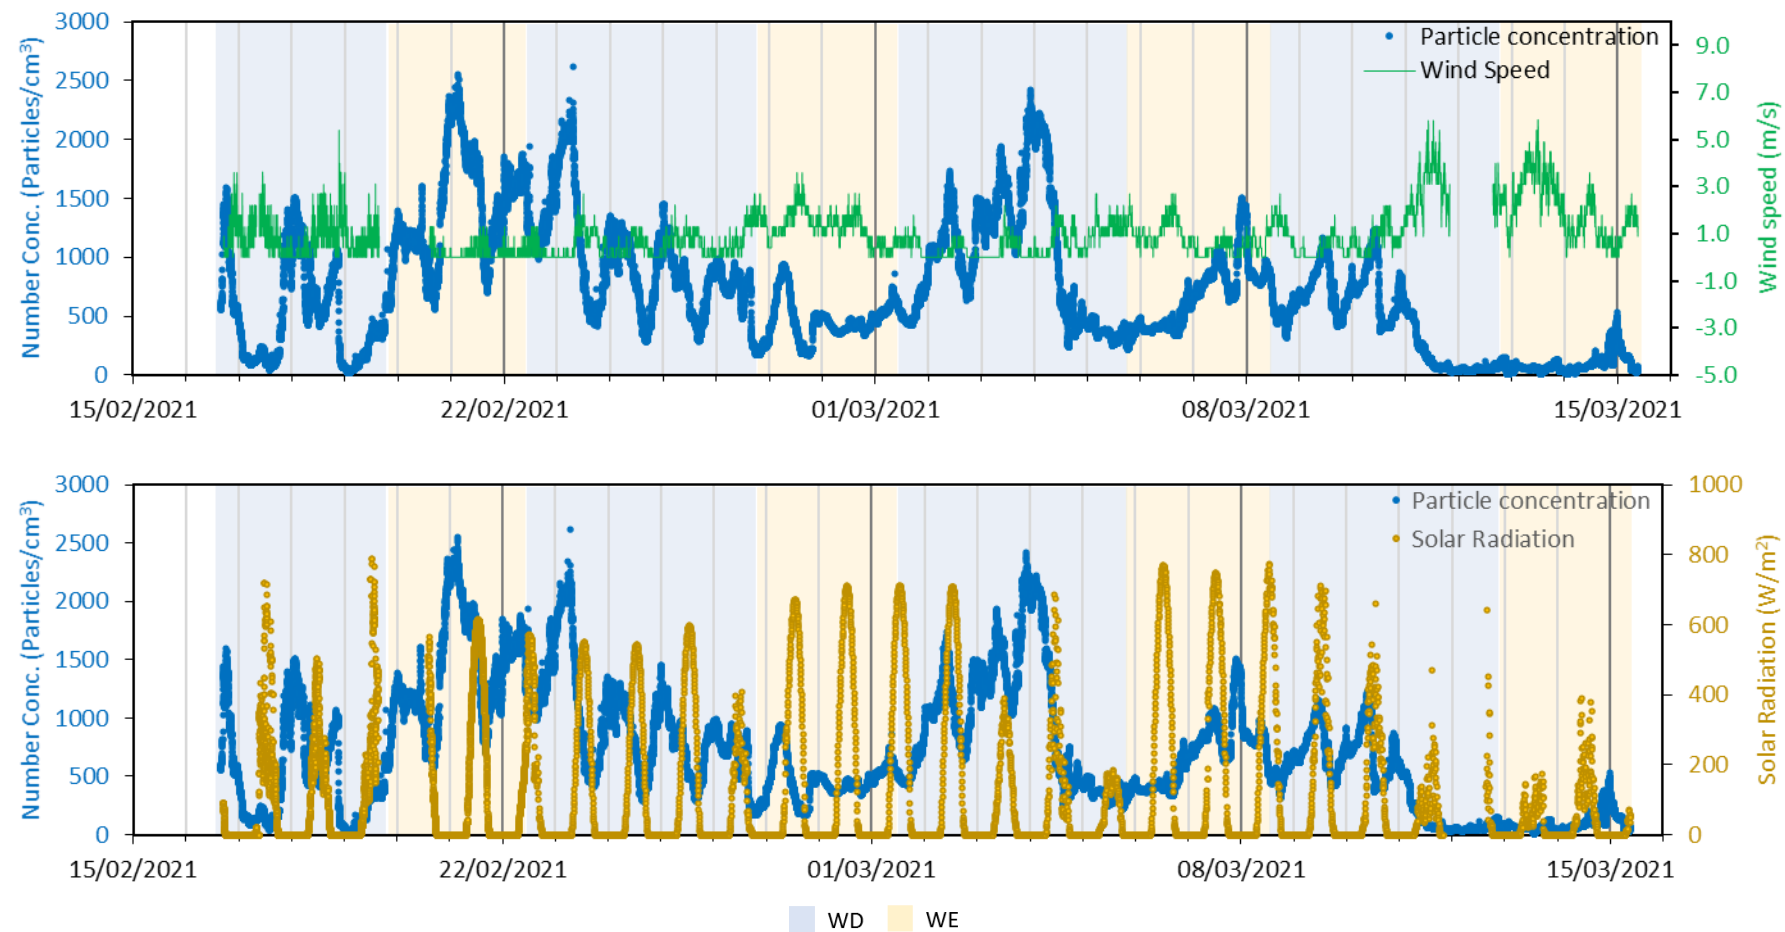

**Figure S5.** Variation of particle number concentration and different weather parameters (temperature, relative humidity, wind speed and solar radiation) during the experimental campaign. (\* used to indicate the sampling periods when the pollution episodes occurred.).

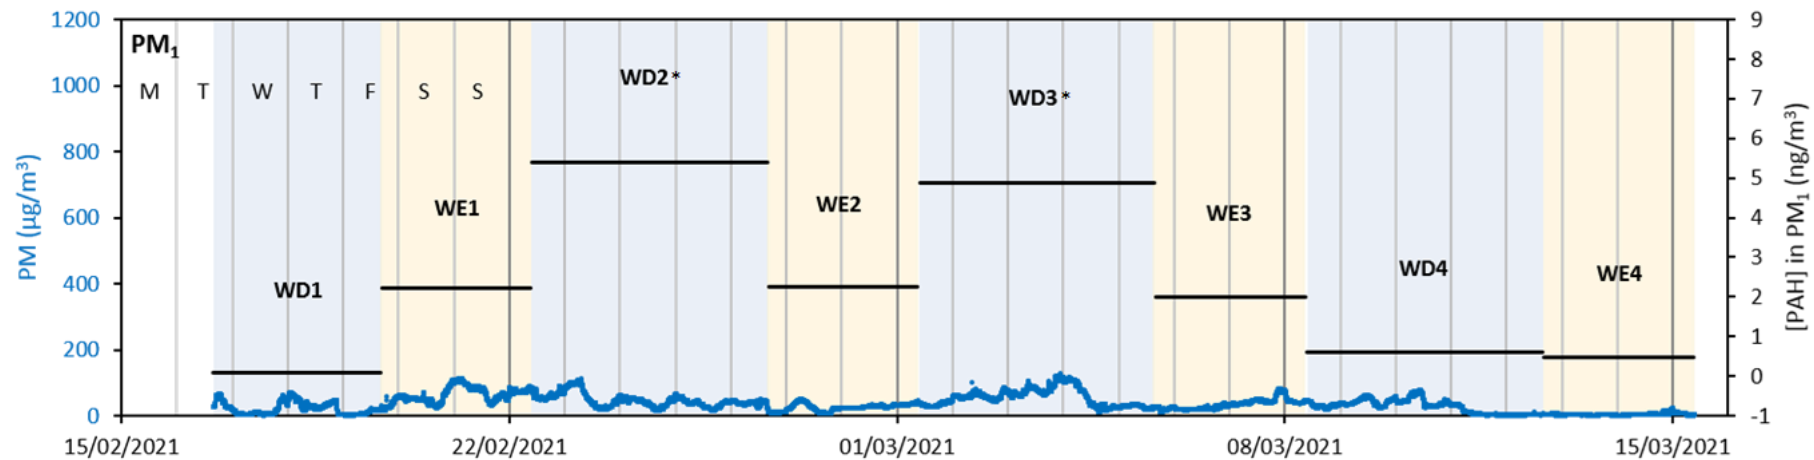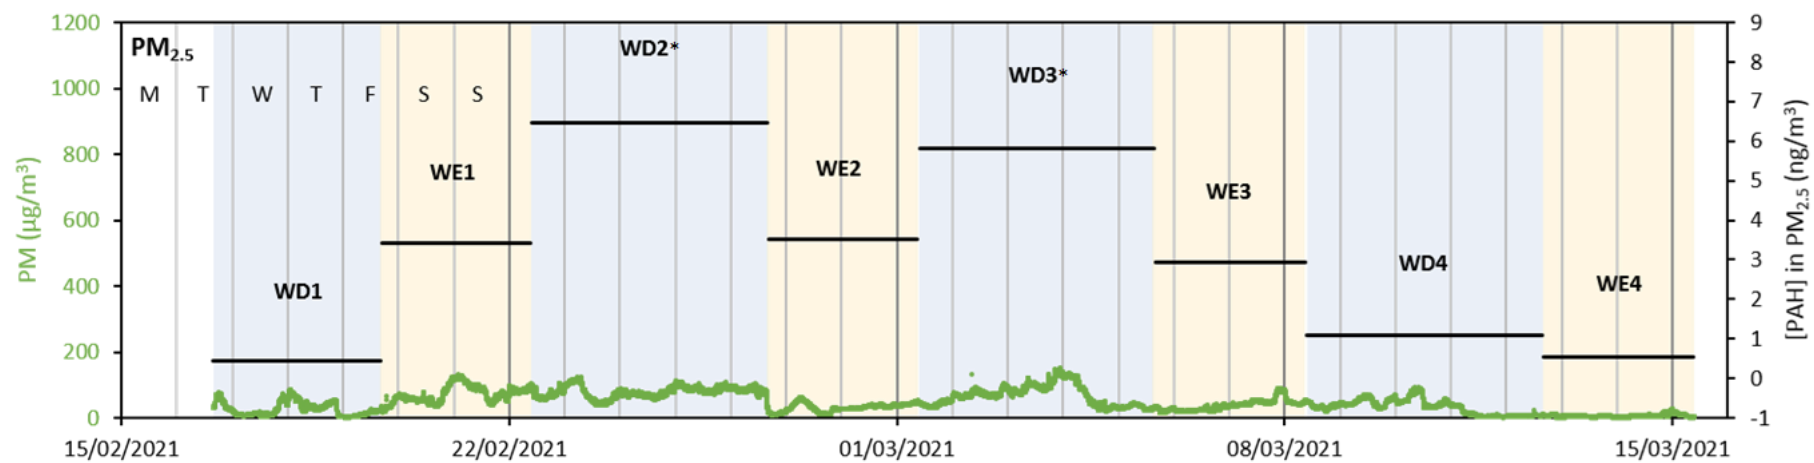

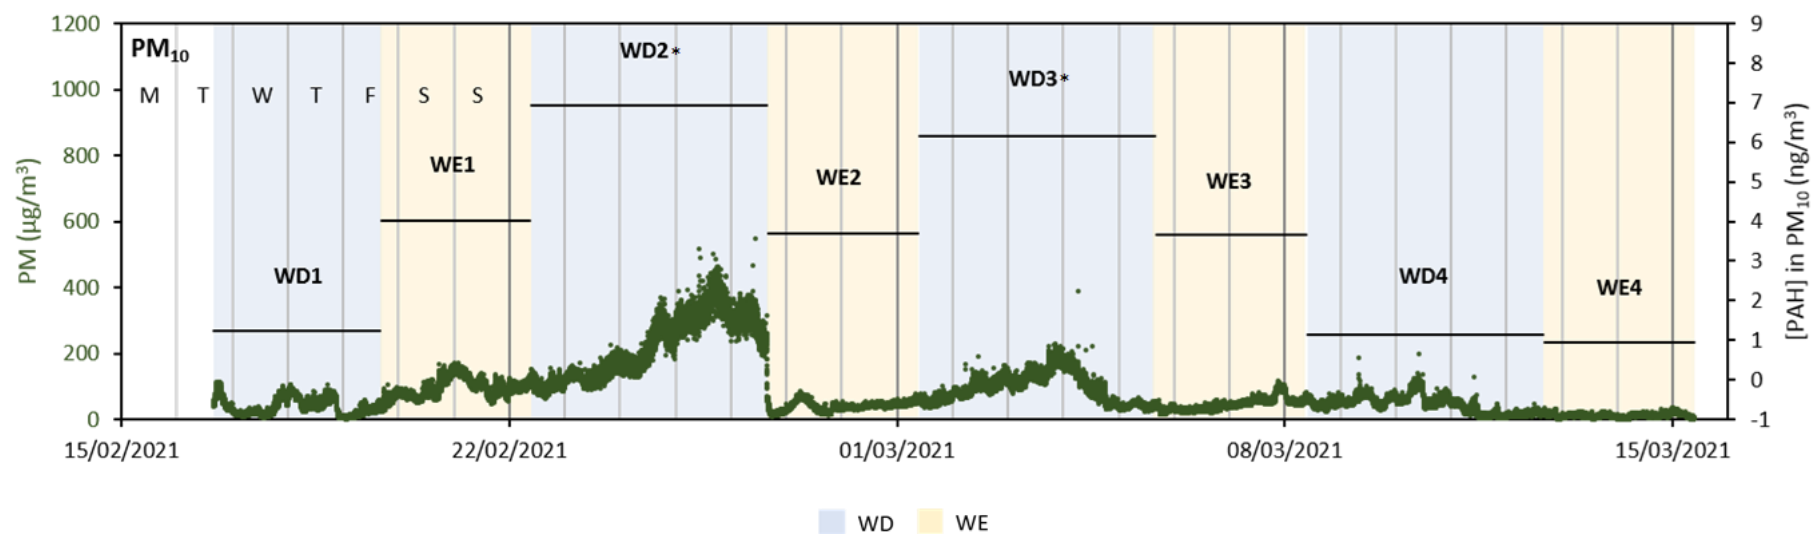

**Figure S6.** Temporal distribution of PM values and PAH concentration in PM fractions ( $\text{PM}_1$ ,  $\text{PM}_{2.5}$  and  $\text{PM}_{10}$ ). (\* used to indicate the sampling periods when the pollution episodes occurred.)

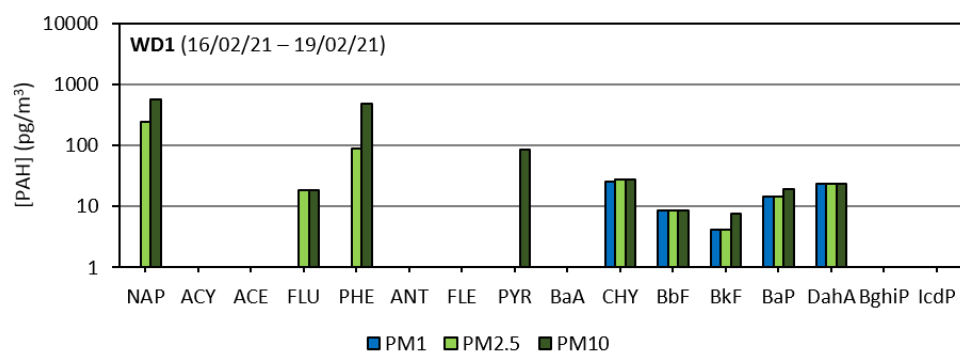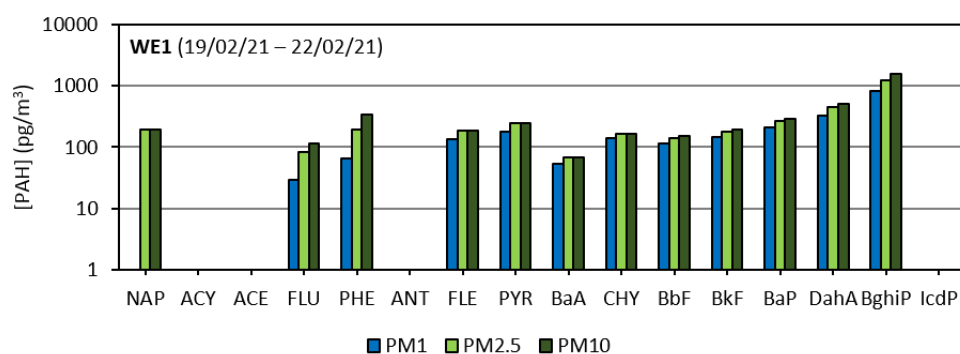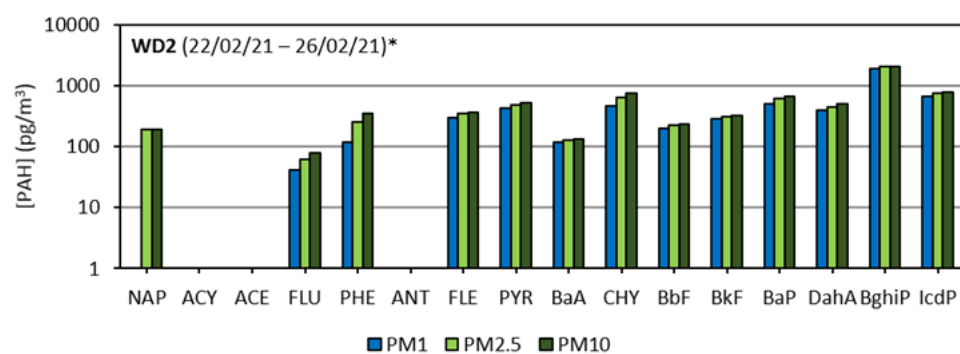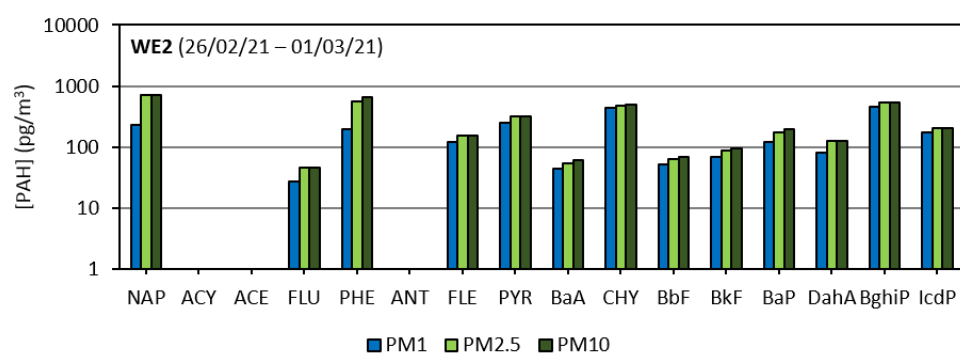

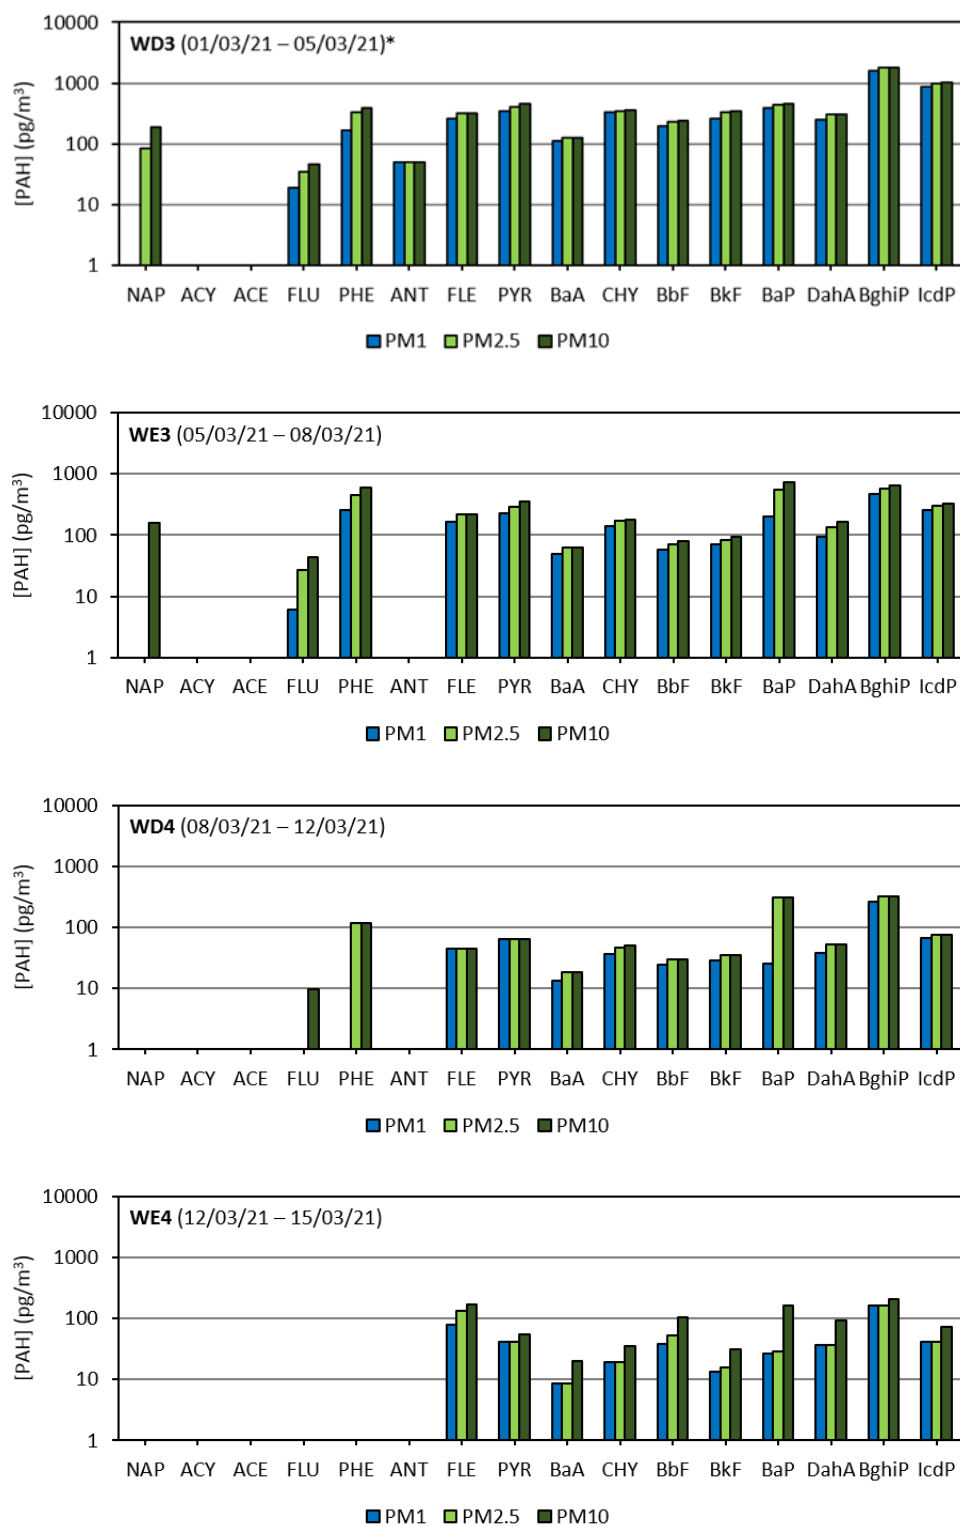

**Figure S7.** Individual PAH concentration in PM fractions (PM<sub>1</sub>, PM<sub>2.5</sub> and PM<sub>10</sub>) for the different sampling periods. (\* used to indicate the sampling periods when the pollution episodes occurred.).

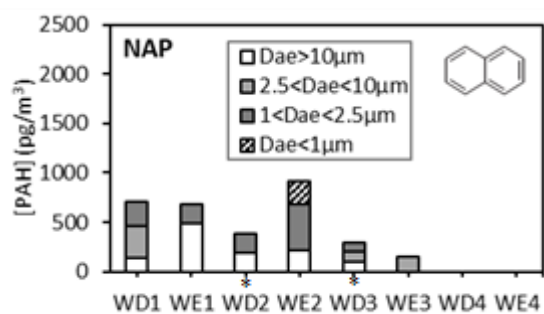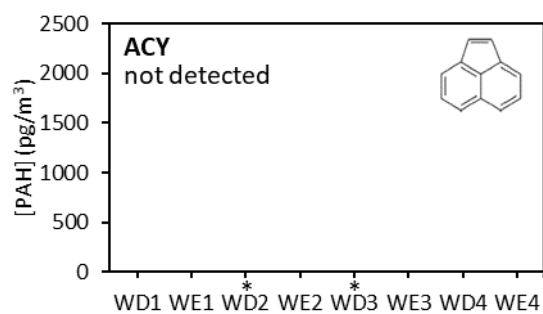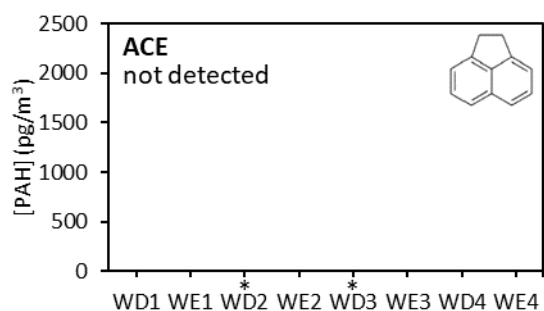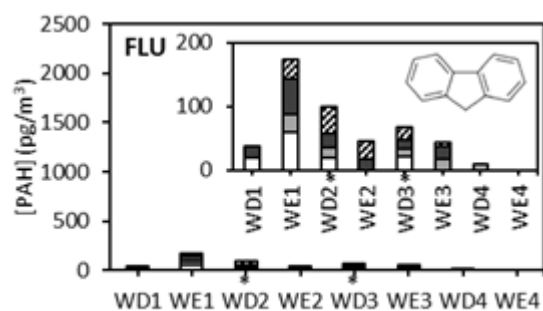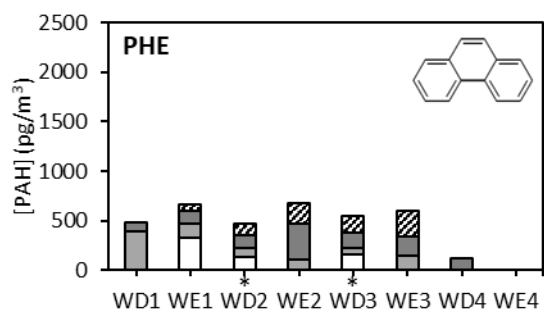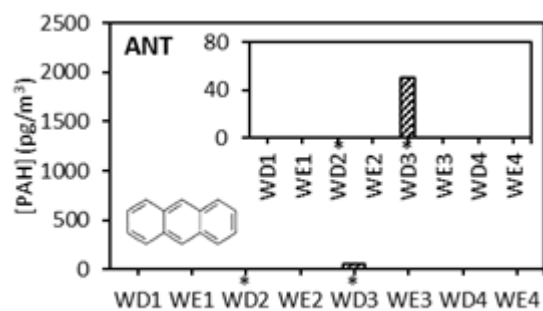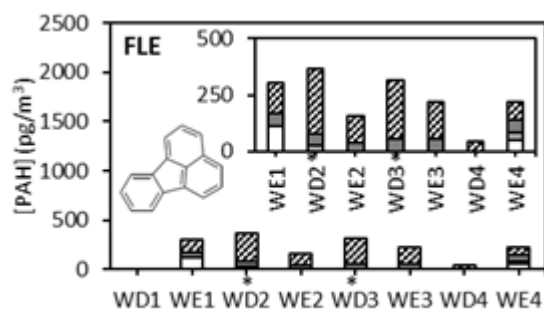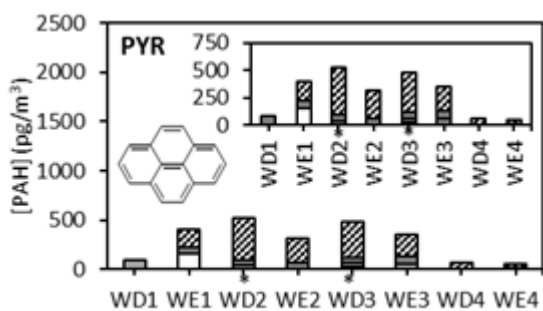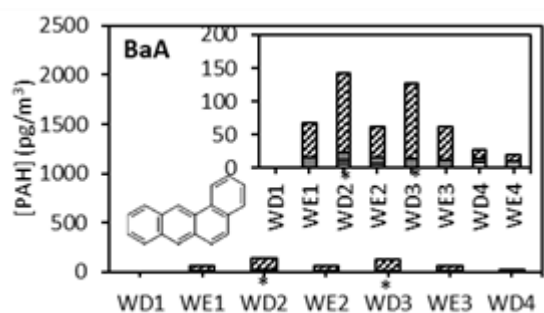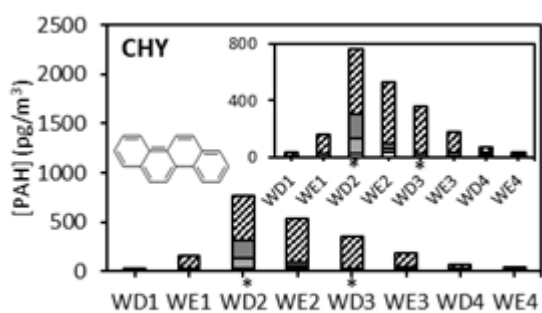

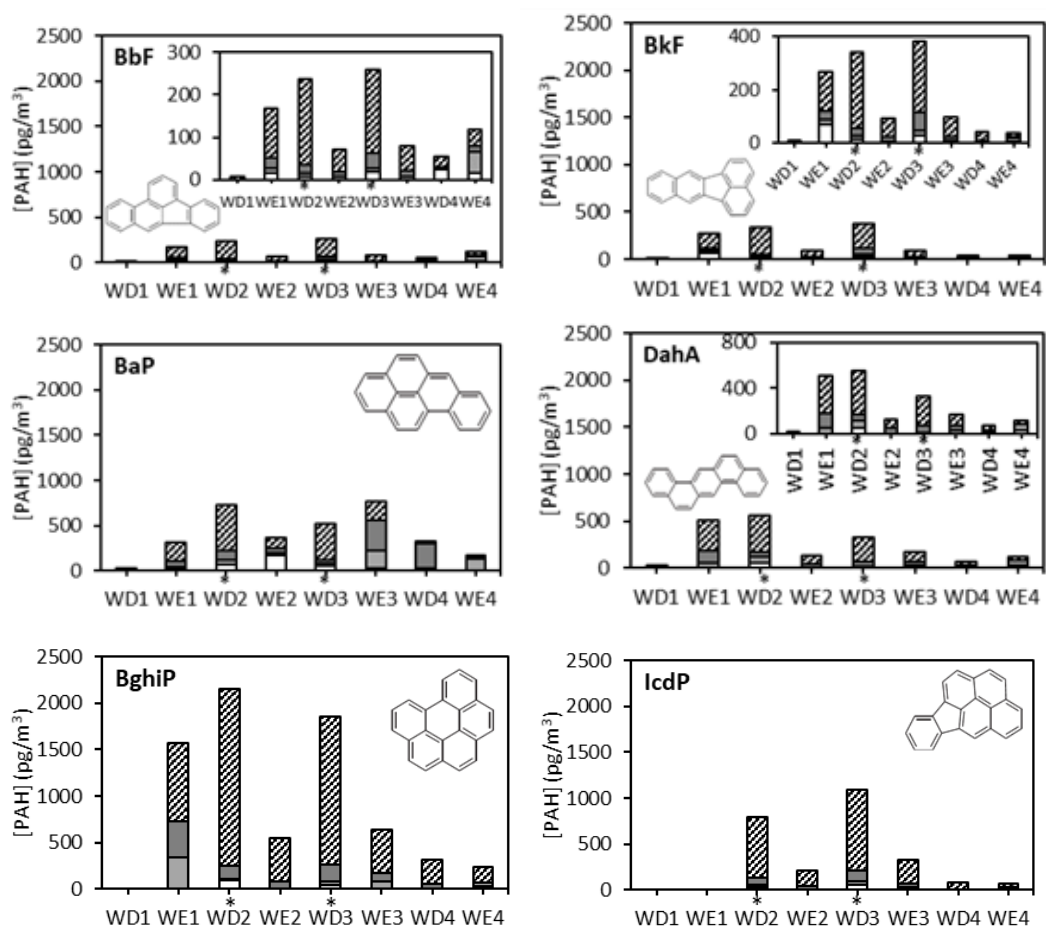

**Figure S8.** Temporal distribution of individual PAH concentration corresponding to collection plates ( $D_{ae} > 10 \mu\text{m}$ ,  $10 \mu\text{m} > D_{ae} > 2.5 \mu\text{m}$ , and  $2.5 \mu\text{m} > D_{ae} > 1 \mu\text{m}$ ). (\* used to indicate the sampling periods when the pollution episodes occurred.)

**Table S1.** Normalized PAH in each PM fraction.

| Period | PAH/PM ratio (ng/μg)                      |                                               |                                             |
|--------|-------------------------------------------|-----------------------------------------------|---------------------------------------------|
|        | PAH in PM <sub>1</sub> /PM <sub>1</sub> a | PAH in PM <sub>2.5</sub> /PM <sub>2.5</sub> a | PAH in PM <sub>10</sub> /PM <sub>10</sub> a |
| WD1    | 0.01 (7%)                                 | 0.05 (41%)                                    | 0.07 (52%)                                  |
| WE1    | 0.06 (33%)                                | 0.06 (32%)                                    | 0.06 (35%)                                  |
| WD2*   | 0.21 (50%)                                | 0.13 (30%)                                    | 0.09 (20%)                                  |
| WE2    | 0.20 (37%)                                | 0.20 (37%)                                    | 0.14(26%)                                   |
| WD3*   | 0.13 (39%)                                | 0.12 (36%)                                    | 0.09 (25%)                                  |
| WE3    | 0.48 (43%)                                | 0.32 (29%)                                    | 0.31 (28%)                                  |
| WD4    | 0.08 (28%)                                | 0.11 (40%)                                    | 0.09 (32%)                                  |
| WE4    | 0.10 (52%)                                | 0.05 (25%)                                    | 0.04 (22%)                                  |

values in brackets indicate the percentage of each fraction

\* indicates the sampling period when the pollution episodes occurred.

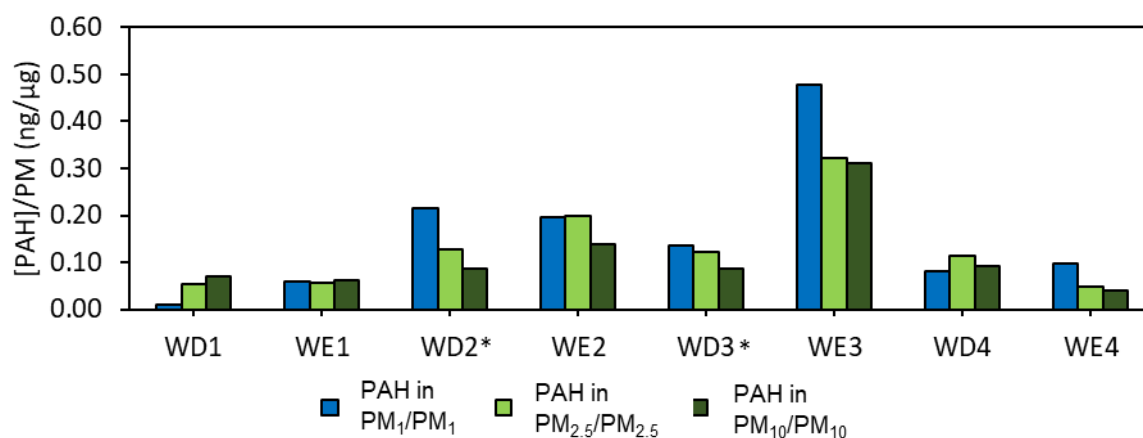

**Figure S9.** Normalized PAH concentration in each PM fraction. (\* used to indicate the sampling periods when the pollution episodes occurred.)

**Table S2.** BaP<sub>eq</sub> values.

| <b>Period</b> | <b>BaP<sub>eq</sub> (pg/m<sup>3</sup>)<sup>a</sup></b> |
|---------------|--------------------------------------------------------|
| WD1           | 56.1                                                   |
| WE1           | 900.5                                                  |
| WD2*          | 1462.5                                                 |
| WE2           | 551.2                                                  |
| WD3*          | 1056.5                                                 |
| WE3           | 995.2                                                  |
| WD4           | 424.3                                                  |
| WE4           | 312.0                                                  |

Values in red surpass the BaP target value established by the EU.

\* indicates the sampling period when the pollution episodes occurred.
